# Supplementary material for: Transcriptome Analysis of Canine Cutaneous Melanoma and Melanocytoma Reveals a Modulation of Genes Regulating Extracellular Matrix Metabolism and Cell Cycle
Source: PubMed Central journal article supplement (PMC5526991; doi:10.1038/s41598-017-06281-1), 2017-07-25
Supplement: 41598_2017_6281_MOESM1_ESM.pdf [file 41598_2017_6281_MOESM1_ESM.pdf]

**TRANSCRIPTOME ANALYSIS OF CANINE CUTANEOUS MELANOMA AND  
MELANOCYTOMA REVEALS A MODULATION OF GENES REGULATING  
EXTRACELLULAR MATRIX METABOLISM AND CELL CYCLE**

Chiara Brachelente, Katia Cappelli, Stefano Capomaccio, Ilaria Porcellato, Serenella Silvestri, Laura Bongiovanni, Raffaella De Maria, Andrea Verini Supplizi, Luca Mechelli & Monica Sforza

**Supplementary Table 1.** Summary statistics on the sequenced samples in read pairs of samples submitted to RNA-seq.

| <b>Case No.</b> | <b>Raw Reads</b> | <b>QC Passed</b> | <b>Discarded Seqs (%)</b> | <b>Uniquely Mapped</b> | <b>Uniquely Mapped %</b> |
|-----------------|------------------|------------------|---------------------------|------------------------|--------------------------|
| <b>1</b>        | 33.934.336       | 33.701.111       | 0,69                      | 27.971.790             | 83,00%                   |
| <b>4</b>        | 39.249.148       | 38.781.813       | 1,19                      | 6.515.145              | 16,80%                   |
| <b>5</b>        | 70.144.356       | 69.180.820       | 1,37                      | 10.829.792             | 15,65%                   |
| <b>6</b>        | 31.183.354       | 30.938.657       | 0,78                      | 17.684.984             | 57,16%                   |
| <b>13</b>       | 23.794.350       | 23.611.093       | 0,77                      | 17.364.063             | 73,54%                   |
| <b>16</b>       | 27.417.386       | 27.308.707       | 0,40                      | 25.489.959             | 93,34%                   |
| <b>17</b>       | 33.658.370       | 33.528.972       | 0,38                      | 29.011.664             | 86,53%                   |
| <b>18</b>       | 28.632.604       | 28.544.089       | 0,31                      | 26.615.786             | 93,24%                   |

**Supplementary Table 2.** Differentially expressed genes ranked by fold change. Annotation was added with Biomart.

| Ensembl Gene ID     | logFC | PValue      | FDR (qValue) | Gene Name      | Description                                                       |
|---------------------|-------|-------------|--------------|----------------|-------------------------------------------------------------------|
| ENSCAFG00000029553  | 4.852 | 1.60E-06    | 1.27E-03     |                |                                                                   |
| ENSCAFG00000019985  | 4.580 | 2.15E-05    | 7.90E-03     | <b>COL11A1</b> | collagen, type XI, alpha 1                                        |
| ENSCAFG00000000903  | 4.365 | 1.23E-05    | 5.56E-03     | <b>COL11A2</b> | collagen, type XI, alpha 2                                        |
| ENSCAFG00000010530  | 4.306 | 2.14E-10    | 1.85E-06     | <b>CCDC80</b>  | coiled-coil domain containing 80                                  |
| ENSCAFG00000005603  | 3.990 | 8.44E-09    | 1.99E-05     | <b>ISM1</b>    | isthmin 1 homolog                                                 |
| ENSCAFG00000017618  | 3.907 | 3.33E-07    | 3.27E-04     | <b>DRP2</b>    | dystrophin related protein 2                                      |
| ENSCAFG00000007036  | 3.790 | 2.34E-05    | 8.36E-03     | <b>CD22</b>    | CD22 molecule                                                     |
| ENSCAFG000000031675 | 3.687 | 2.13E-05    | 7.90E-03     | <b>COL8A1</b>  | collagen, type VIII, alpha 1                                      |
| ENSCAFG000000017018 | 3.621 | 7.80E-10    | 3.06E-06     | <b>COL1A1</b>  | collagen, type I, alpha 1                                         |
| ENSCAFG000000018642 | 3.442 | 5.03E-005   | 0.014784381  | <b>NOS2</b>    | nitric oxide synthase                                             |
| ENSCAFG000000000874 | 3.230 | 3.20E-08    | 5.38E-05     | <b>THBS2</b>   | thrombospondin-2                                                  |
| ENSCAFG000000023774 | 3.197 | 9.67E-005   | 0.023694412  | <b>RAMP1</b>   | receptor (G protein-coupled) activity modifying protein 1         |
| ENSCAFG000000012718 | 3.179 | 2.49E-07    | 2.70E-04     | <b>CPXM2</b>   | carboxypeptidase X, member 2                                      |
| ENSCAFG000000018761 | 3.178 | 9.69E-07    | 8.77E-04     | <b>PIEZO2</b>  | piezo-type mechanosensitive ion channel component 2               |
| ENSCAFG000000005527 | 3.106 | 5.74E-06    | 3.24E-03     | <b>P4HA3</b>   | prolyl 4-hydroxylase, alpha polypeptide III                       |
| ENSCAFG000000002069 | 3.093 | 3.14E-10    | 1.85E-06     | <b>COL1A2</b>  | collagen, type I, alpha 2                                         |
| ENSCAFG000000000868 | 3.075 | 2.52E-07    | 2.70E-04     | <b>SMOC2</b>   | SPARC related modular calcium binding 2                           |
| ENSCAFG000000006865 | 2.943 | 3.62E-05    | 1.15E-02     | <b>PAMR1</b>   | peptidase domain containing associated with muscle regeneration 1 |
| ENSCAFG000000002307 | 2.933 | 2.15E-06    | 1.49E-03     | <b>ASPN</b>    | asporin                                                           |
| ENSCAFG000000014812 | 2.898 | 4.20E-08    | 6.18E-05     | <b>COL3A1</b>  | collagen, type III, alpha 1                                       |
| ENSCAFG000000002947 | 2.896 | 0.000230822 | 0.046828998  | <b>PRSS35</b>  | protease, serine, 35                                              |

|                           |       |             |             |                |                                                          |
|---------------------------|-------|-------------|-------------|----------------|----------------------------------------------------------|
| <b>ENSCAFG0000005843</b>  | 2.892 | 0.000210632 | 0.043482483 | <b>LTBP1</b>   | latent transforming growth factor binding protein 1      |
| <b>ENSCAFG0000000667</b>  | 2.890 | 4.17E-06    | 2.58E-03    | <b>FNDC1</b>   | fibronectin type III domain containing 1                 |
| <b>ENSCAFG00000010930</b> | 2.851 | 1.97E-09    | 5.78E-06    | <b>COL16A1</b> | collagen, type XVI, alpha 1                              |
| <b>ENSCAFG00000009282</b> | 2.751 | 8.78E-06    | 4.49E-03    | <b>CREB3L1</b> | cAMP responsive element binding protein 3-like 1         |
| <b>ENSCAFG00000005880</b> | 2.742 | 7.33E-005   | 0.019612931 |                |                                                          |
| <b>ENSCAFG00000006608</b> | 2.699 | 1.94E-06    | 1.42E-03    | <b>CPXM1</b>   | carboxypeptidase X, member 1                             |
| <b>ENSCAFG00000014837</b> | 2.635 | 7.01E-08    | 9.16E-05    | <b>COL5A2</b>  | collagen, type V, alpha 2                                |
| <b>ENSCAFG00000019238</b> | 2.605 | 5.79E-06    | 3.24E-03    | <b>MMP23B</b>  | matrix metalloproteinase 23B                             |
| <b>ENSCAFG00000020166</b> | 2.517 | 2.67E-08    | 5.23E-05    | <b>ANGPTL2</b> | angiopoietin-like 2                                      |
| <b>ENSCAFG00000032273</b> | 2.498 | 0.000182255 | 0.04046415  |                |                                                          |
| <b>ENSCAFG00000012762</b> | 2.482 | 0.00012663  | 0.029521978 | <b>COCH</b>    | coagulation factor C homolog, cochlin                    |
| <b>ENSCAFG00000011908</b> | 2.462 | 7.06E-06    | 3.77E-03    | <b>SHTN1</b>   | shootin 1                                                |
| <b>ENSCAFG00000013079</b> | 2.445 | 4.06E-06    | 2.58E-03    | <b>OLFML2B</b> | olfactomedin-like 2B                                     |
| <b>ENSCAFG00000019848</b> | 2.443 | 1.09E-05    | 5.14E-03    | <b>COL5A1</b>  | collagen, type V, alpha 1                                |
| <b>ENSCAFG00000020367</b> | 2.428 | 0.00019811  | 0.042384719 | <b>PLEKHG4</b> | pleckstrin homology domain containing, family G member 4 |
| <b>ENSCAFG00000028461</b> | 2.397 | 9.82E-06    | 4.82E-03    | <b>LOX</b>     | lysyl oxidase                                            |
| <b>ENSCAFG00000006424</b> | 2.389 | 4.27E-05    | 1.32E-02    | <b>GXYLT2</b>  | glucoside xylosyltransferase 2                           |
| <b>ENSCAFG00000008056</b> | 2.370 | 6.47E-005   | 0.018125915 | <b>RYR3</b>    | ryanodine receptor 3                                     |
| <b>ENSCAFG00000010061</b> | 2.344 | 7.70E-005   | 0.020142478 | <b>ABCC11</b>  | ATP-binding cassette, sub-family C, member 11            |
| <b>ENSCAFG00000000686</b> | 2.315 | 0.000127953 | 0.029521978 |                |                                                          |
| <b>ENSCAFG00000014670</b> | 2.247 | 4.61E-05    | 1.39E-02    | <b>NID2</b>    | nidogen 2 (osteonidogen)                                 |
| <b>ENSCAFG00000016828</b> | 2.142 | 2.84E-05    | 9.43E-03    | <b>COPZ2</b>   | coatamer protein complex, subunit zeta 2                 |
| <b>ENSCAFG00000017262</b> | 2.136 | 2.88E-05    | 9.43E-03    | <b>MYH10</b>   | myosin, heavy chain 10                                   |

|                           |        |             |             |                 |                                                             |
|---------------------------|--------|-------------|-------------|-----------------|-------------------------------------------------------------|
| <b>ENSCAFG00000006234</b> | 2.081  | 6.81E-005   | 0.018646387 | <b>ADAM33</b>   | ADAM metallopeptidase domain 33                             |
| <b>ENSCAFG00000010387</b> | 2.055  | 1.62E-06    | 1.27E-03    | <b>FAP</b>      | fibroblast activation protein, alpha                        |
| <b>ENSCAFG00000019943</b> | 2.051  | 2.59E-05    | 8.95E-03    | <b>CRISPLD2</b> | cysteine-rich secretory protein LCCL domain containing 2    |
| <b>ENSCAFG00000001792</b> | 2.033  | 0.000100326 | 0.024092502 | <b>LIMCH1</b>   | LIM and calponin homology domains 1                         |
| <b>ENSCAFG00000003044</b> | 2.013  | 0.000208688 | 0.043482483 | <b>FKBP14</b>   | FK506 binding protein 14                                    |
| <b>ENSCAFG00000008341</b> | 2.001  | 0.000243386 | 0.048256918 | <b>SPON1</b>    | Uncharacterized protein                                     |
| <b>ENSCAFG00000006073</b> | 1.971  | 0.000246062 | 0.048256918 | <b>POSTN</b>    | periostin                                                   |
| <b>ENSCAFG00000013256</b> | 1.957  | 1.46E-05    | 5.94E-03    | <b>MRC2</b>     | mannose receptor, C type 2                                  |
| <b>ENSCAFG00000012226</b> | 1.931  | 9.66E-005   | 0.023694412 | <b>COL6A3</b>   | collagen, type VI, alpha 3                                  |
| <b>ENSCAFG00000001875</b> | 1.876  | 8.97E-005   | 0.022950061 | <b>CKAP4</b>    | cytoskeleton-associated protein 4                           |
| <b>ENSCAFG00000000334</b> | 1.849  | 1.84E-05    | 7.22E-03    | <b>ADAMTS2</b>  | ADAM metallopeptidase with thrombospondin type 1 motif, 2   |
| <b>ENSCAFG00000014322</b> | 1.661  | 6.44E-005   | 0.018125915 | <b>PCOLCE</b>   | procollagen C-endopeptidase enhancer                        |
| <b>ENSCAFG00000018570</b> | -2.306 | 0.00018037  | 0.04046415  | <b>SGIP1</b>    | SH3-domain GRB2-like (endophilin) interacting protein 1     |
| <b>ENSCAFG00000023349</b> | -4.142 | 1.44E-05    | 5.94E-03    |                 |                                                             |
| <b>ENSCAFG00000011838</b> | -5.263 | 1.40E-05    | 5.94E-03    | <b>ST8SIA1</b>  | ST8 alpha-N-acetylneuraminide alpha-2,8-sialyltransferase 1 |
| <b>ENSCAFG00000012848</b> | -6.947 | 0.000185903 | 0.040509549 | <b>COL20A1</b>  | collagen, type XX, alpha 1                                  |

**Supplementary Table 4.** Primer were designed based on available sequences using the Primer-BLAST software.

| <b>Gene</b>           | <b>Accession</b> | <b>Forward</b>        | <b>Reverse</b>           | <b>Efficiency</b> | <b>Amp. Size</b> |
|-----------------------|------------------|-----------------------|--------------------------|-------------------|------------------|
| <b><i>GUSβ</i></b>    | NM_001003191     | GTGCTGGATCAGAAACGCAA  | CTTTGGGTTGTCTCTGGCGA     | 96%               | 136              |
| <b><i>HMBS</i></b>    | XM_546491.5      | GGTGGGCGTGTTCATGA     | AGGTACAGTTGCCATCCTTCATAG | 105%              | 132              |
| <b><i>THBS2</i></b>   | NM_001197156     | ATTCGCCATCAAGGCAAGGA  | CCACGGACCCAAACTCATCA     | 110%              | 85               |
| <b><i>COL1A1</i></b>  | NM_001003090     | AGAGCATGACCGACGGATTC  | ACGCTGTTCTTGCAAGTGGTA    | 90                | 139              |
| <b><i>COL11A1</i></b> | XM_005621852     | AAGCTCAAGCTCAGGCGATT  | TCACCACTCTCACCTTTGGC     | 87%               | 133              |
| <b><i>NOS2</i></b>    | NM_001313848     | CCTACCAGTACGACTTGACCG | TGGGGTCATCCTGTGTCCT      | 99%               | 96               |
| <b><i>ADAMTS2</i></b> | XM_843844        | GTGGAGTGGGAGTACAGGGA  | GTATGTCAGCGAGATCCGGG     | 113%              | 120              |
